# Supplementary material for: Large scale eDNA database reveals potential for pseudo biodiversity
Source: Research Square preprint supplement (doi:10.21203/rs.3.rs-7872521/v1), 2025-11-06
Supplement: Supplementary file 1 [file 61380617987e490a2da8a9a9.docx]

**Large scale eDNA database reveals latitudinal diversity gradients with seasonal variations**

Minoru Kasada1*, Naoto Shinohara1, Riku Fukasawa1, Akifumi S. Tanabe1, Michio Kondoh1

**Supporting Information**

**
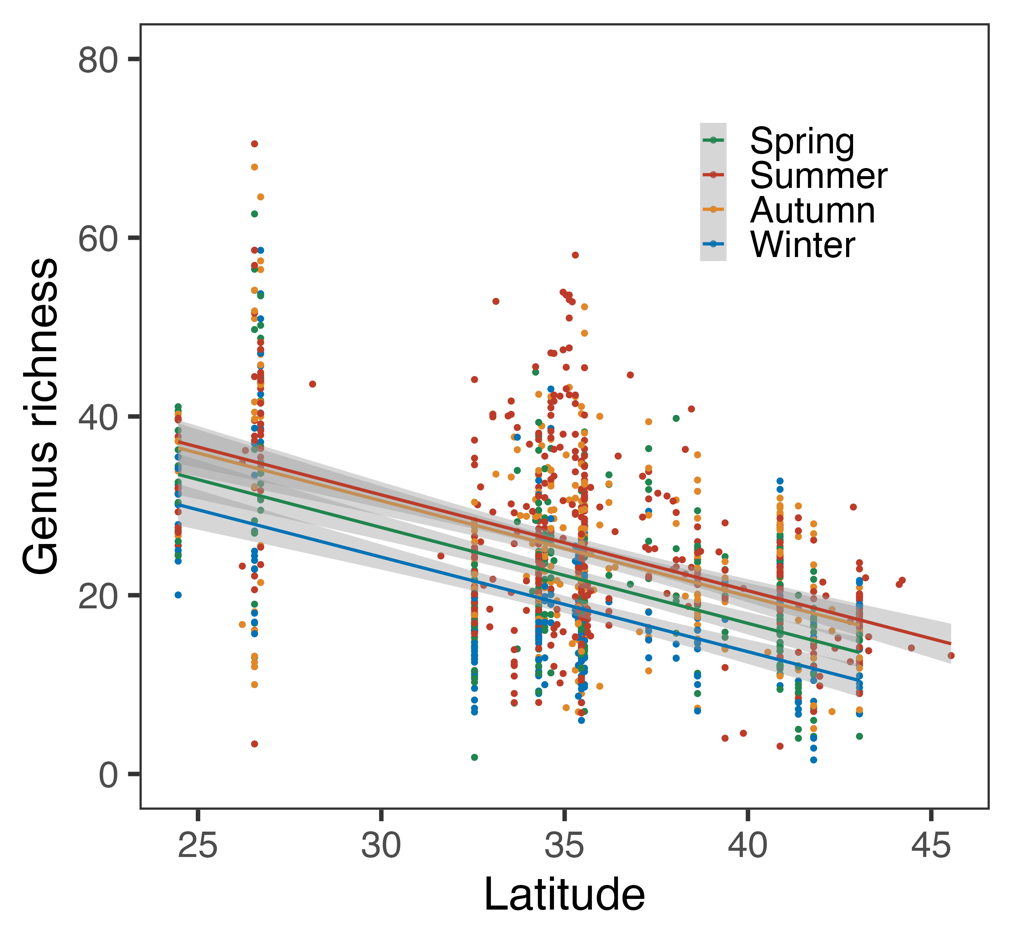
**

**Figure S1.** Relationships between Latitude and genus richness. The data was pooled for all sampling surveys. The green, red, orange and blue colors represent spring, summer, autumn and winter, respectively. The dots represent sampling sites. The lines are regression lines and the grey areas are 95% confidence intervals.

**
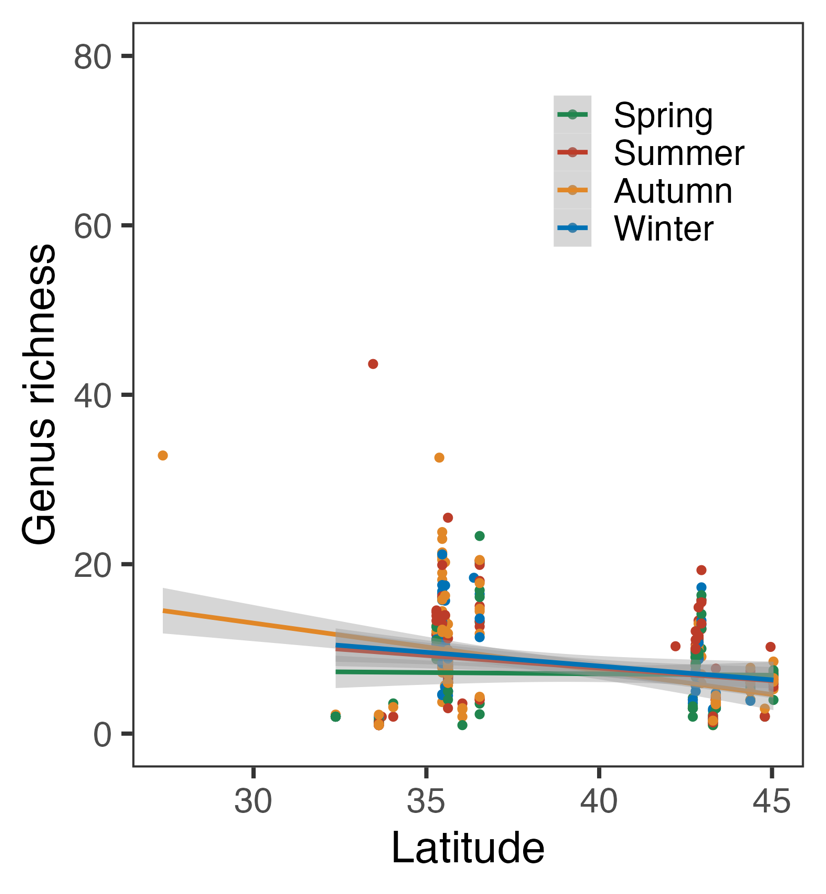
**

**Figure S2.** Relationships between latitude and genus richness for Japanese inland waters from ANEMONE DB. The green, red, orange and blue colors represent spring, summer, autumn and winter, respectively. The dots represent sampling sites. The lines are regression lines and the grey areas are 95% confidence intervals.

**Table S1. Coefficients of the generalized linear model (GLM) for the data pooled for all sampling surveys.**

***: *p* < 0.001, **: *p* < 0.01, *: *p* < 0.05.

|  | **Japanese waters (pooled)** |
| --- | --- |
| **(Intercept)** | 46.536*** |
| **Latitude** | -0.832*** |
| **Spring** | 8.470 |
| **Summer** | 9.757 |
| **Autumn** | 11.859* |
| **Methods  (qualitative vs quantitative)** | 1.425 |
| **Latitude:Spring** | -0.148 |
| **Latitude:Summer** | -0.131 |
| **Latitude:Autumn** | -0.161 |

**Table S2. Coefficients of the generalized linear model (GLM) for the data for Japanese inland waters from ANEMONE DB. The explanatory variable, “Methods” include “quantitative” only, so it was excluded from the analysis.**

***: *p* < 0.001, **: *p* < 0.01, *: *p* < 0.05.

|  | **Inland waters** |
| --- | --- |
| **(Intercept)** | 24.163*** |
| **Latitude** | -0.408** |
| **Spring** | -15.285* |
| **Summer** | -2.040 |
| **Autumn** | 5.762 |
| **Latitude:Spring** | 0.362* |
| **Latitude:Summer** | 0.048 |
| **Latitude:Autumn** | -0.155 |
